# Supplementary material for: Electrocatalytic H2 evolution using binuclear cobalt complexes as catalysts
Source: Royal Society of Chemistry journal article supplement (doi:10.1039/d2ra05109e), 2022-01-01
Supplement: d2ra05109e1.pdf [file d2ra05109e1.pdf]

## Supporting Information

### **Electrocatalytic H<sub>2</sub> evolution using Binuclear cobalt complexes as electrocatalysts**

Tung H. To<sup>\*</sup>; Dang B. Tran; Vu Thi Thu Ha, Phong D. Tran<sup>\*</sup>

# NMR spectra of Ligand (L) N,N'-Bis(salicylidene)-phenylmethanediamine

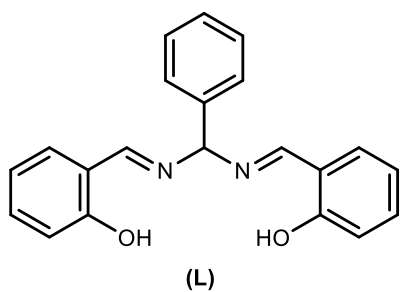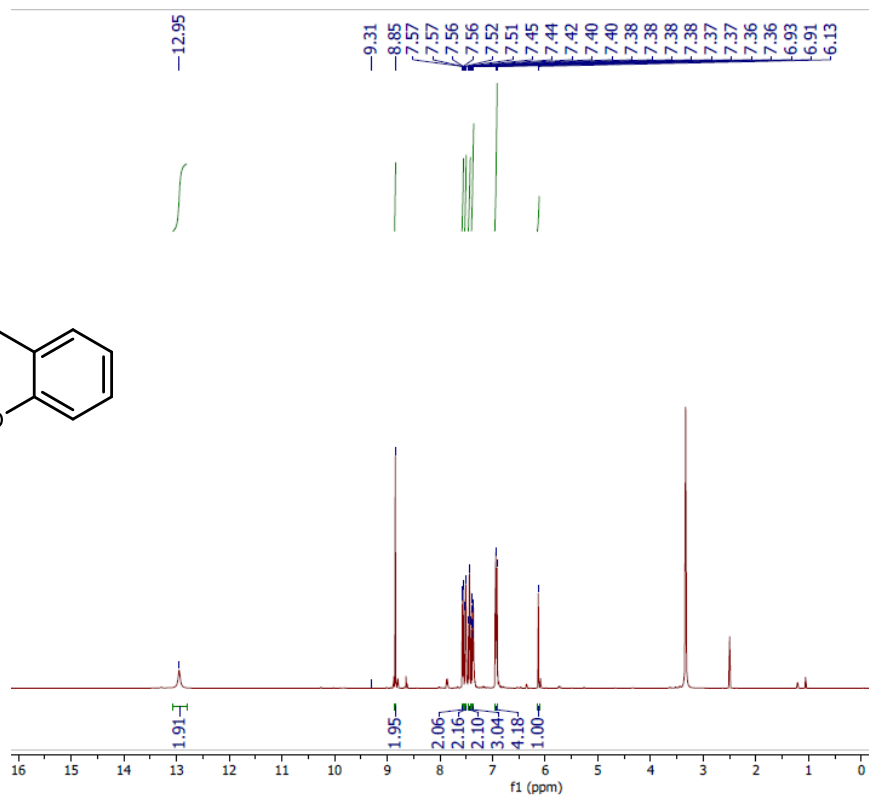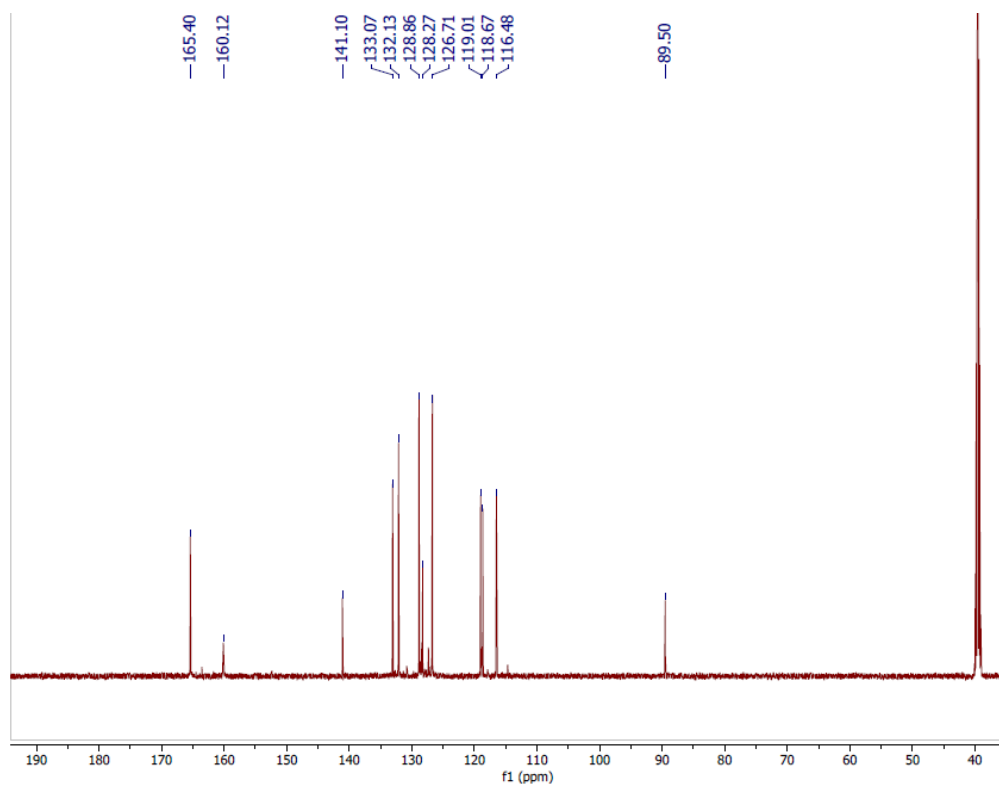

**Table S1.** X-ray structure data collection and refinement parameters

|                                               | <b>2</b>                                                                                     |
|-----------------------------------------------|----------------------------------------------------------------------------------------------|
| Formula                                       | C <sub>52</sub> H <sub>42</sub> O <sub>4</sub> N <sub>6</sub> Co <sub>2</sub> I <sub>3</sub> |
| <i>M<sub>w</sub></i>                          | 1313.47                                                                                      |
| Crystal system                                | Monoclinic                                                                                   |
| <i>a</i> (Å)                                  | 15.9062(16)                                                                                  |
| <i>b</i> (Å)                                  | 19.149(2)                                                                                    |
| <i>c</i> (Å)                                  | 17.2316(18)                                                                                  |
| <i>α</i> (°)                                  | 90                                                                                           |
| <i>β</i> (°)                                  | 105.992(3)                                                                                   |
| <i>γ</i> (°)                                  | 90                                                                                           |
| <i>V</i> (Å <sup>3</sup> )                    | 105.992(3)                                                                                   |
| Space group                                   | C2/c                                                                                         |
| <i>Z</i>                                      | 4                                                                                            |
| <i>D<sub>calc</sub></i> (g cm <sup>-3</sup> ) | 1.729                                                                                        |
| <i>μ</i> (mm <sup>-1</sup> )                  | 2.543                                                                                        |
| No. of reflections                            | 33797                                                                                        |
| No. of independent                            | 4970                                                                                         |
| <i>R<sub>int</sub></i>                        | 0.0550                                                                                       |
| No. parameters                                | 305                                                                                          |
| <i>R<sub>1</sub>/wR<sub>2</sub></i>           | 0.0622/<br>0.1314                                                                            |
| GOF                                           | 1.060                                                                                        |

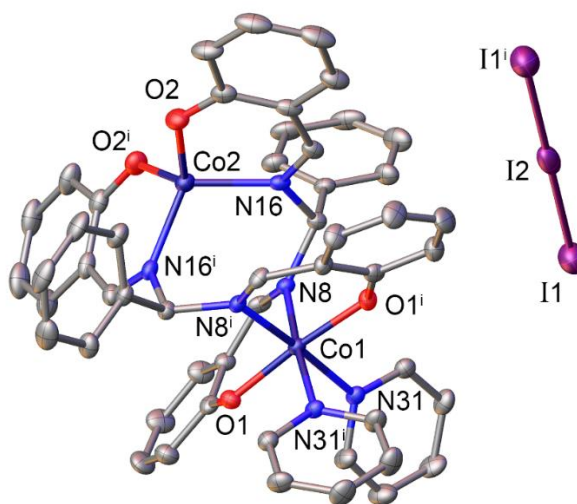**Table S2.** Selected bond length in complex **2**

| Atom | Atom             | Length/Å   | Atom | Atom             | Length/Å |
|------|------------------|------------|------|------------------|----------|
| I2   | I1               | 2.9152(10) | Co1  | N8 <sup>2</sup>  | 1.962(4) |
| I2   | I1 <sup>1</sup>  | 2.9152(10) | Co1  | N8               | 1.962(4) |
| Co1  | O1 <sup>2</sup>  | 1.869(4)   | Co2  | N16              | 1.985(5) |
| Co1  | O1               | 1.869(4)   | Co2  | N16 <sup>2</sup> | 1.985(5) |
| Co1  | N31              | 1.981(5)   | Co2  | O2               | 1.896(5) |
| Co1  | N31 <sup>2</sup> | 1.981(5)   | Co2  | O2 <sup>2</sup>  | 1.896(5) |
| Co1  | Co2              | 4.175(5)   |      |                  |          |

<sup>1</sup>1/2-X, 1/2-Y, 1-Z; <sup>2</sup>1-X, +Y, 1/2-Z

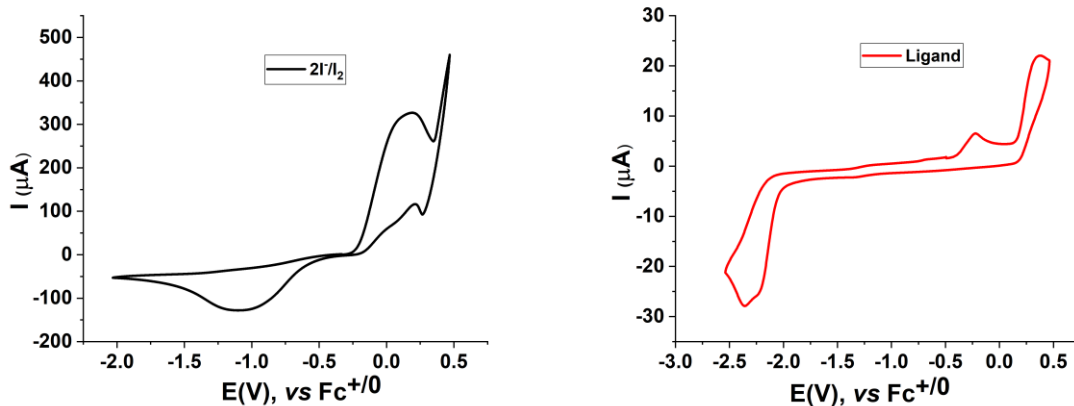

**Figure S1:** Cyclic voltammograms of **I/I couple** (black line) and **ligand** (redline) recorded at a stationary glassy carbon electrode in DMF with a potential scan rate of  $50 \text{ mV}\cdot\text{s}^{-1}$

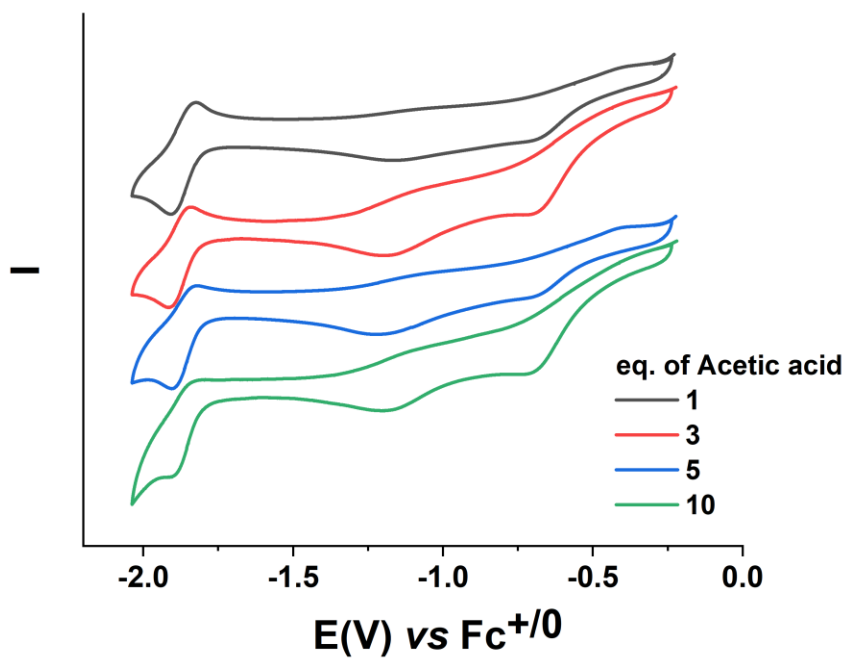

**Figure S2:** Cyclic voltammograms of a 1 mM solution of complex **2** with different equivalent of acetic acid recorded at a stationary glassy carbon electrode in DMF with a potential scan rate of  $50 \text{ mV}\cdot\text{s}^{-1}$

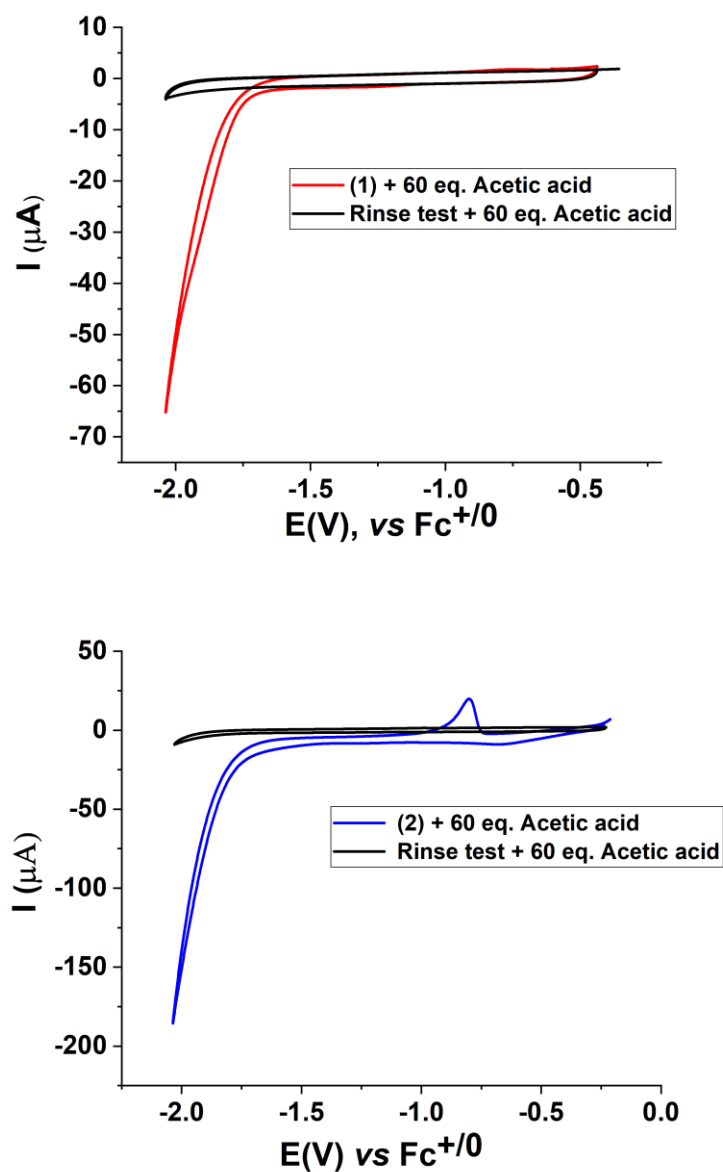

**Figure S3:** “Rinse test” control experiments of two complexes: The glassy carbon electrode, after participating the proton reduction in the presence of catalysts with 60 mM concentration of AA (red line and blue line), was cleaned by DMF solvent washing and used as the working electrode in the proton reduction without catalysts (black line). (DMF solution;  $50 \text{ mV}\cdot\text{s}^{-1}$  scan rate).

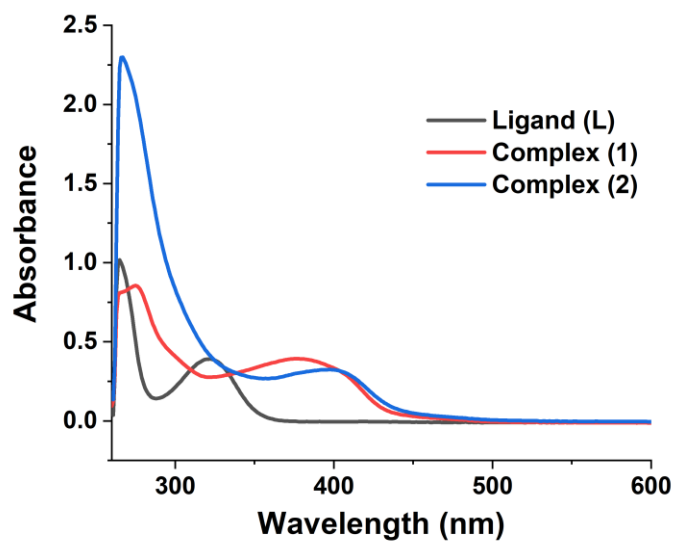

**Figure S4:** UV-Vis spectra of Ligand and complexes **1** and **2** recorded in DMF

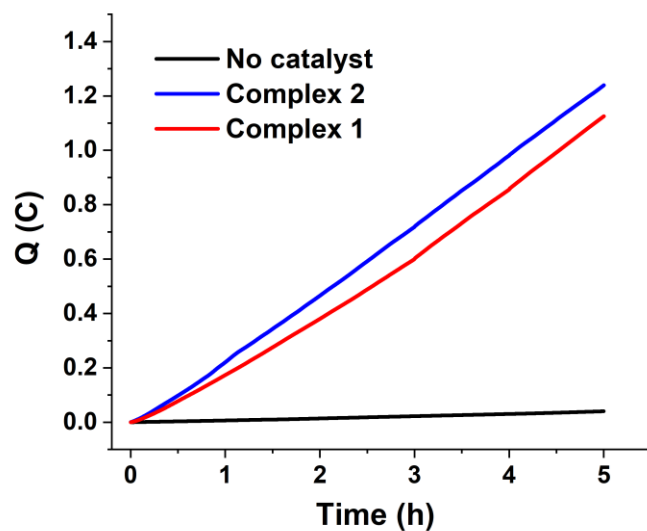

**Figure S5:** Coulometry for bulk electrolysis at -1.93 V vs.  $Fc^{+/0}$ . The electrolytic solution contains 0.1 M TBATBF in DMF, 60 mM Acetic acid: without catalysts (black line) or 1 mM of **1** (red line) or 1 mM of **2** (blue line)

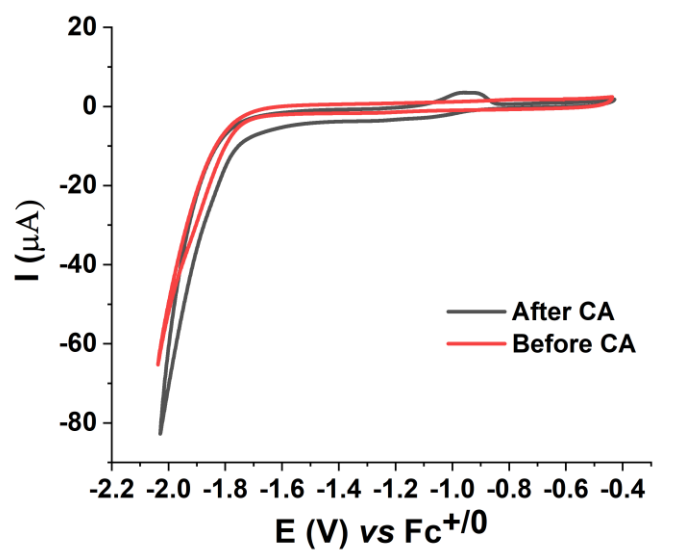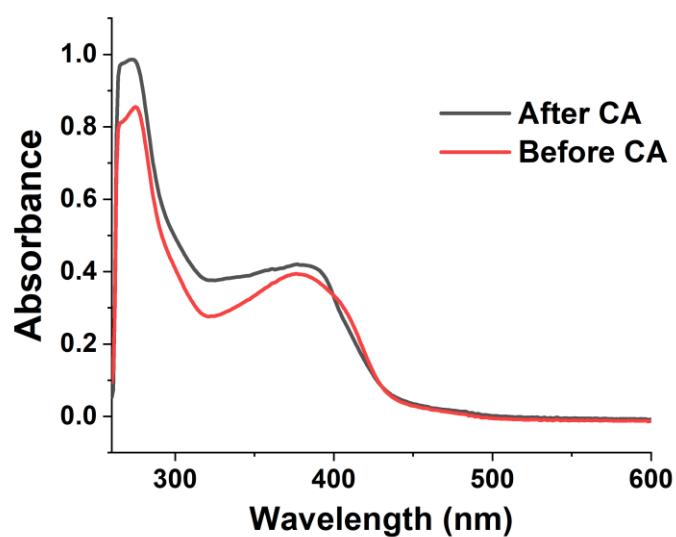

**Figure S6:** Cyclic voltammograms and UV-Vis spectra of a 1 mM solution of complex **1** in DMF in the presence of 60 mM of Acetic acid before and after 5-hour bulk electrolysis performed at  $-1.93$  V vs.  $Fc^{+/0}$

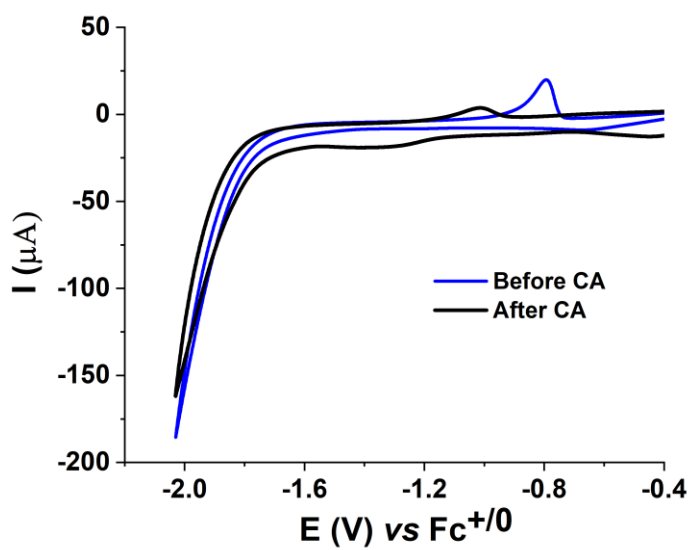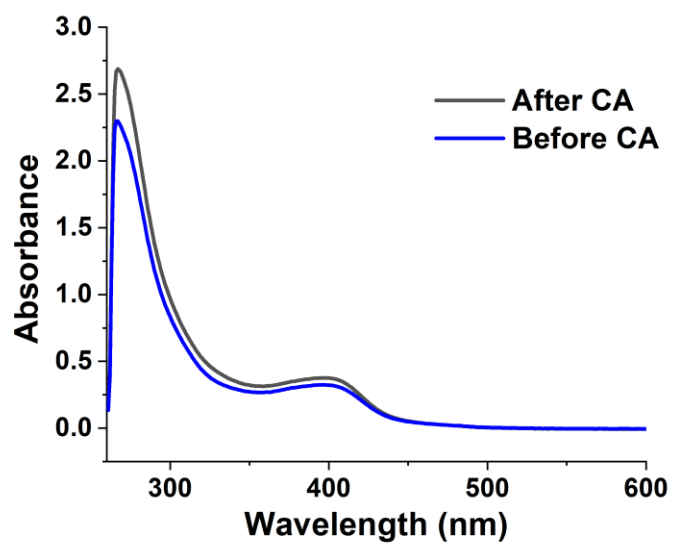

**Figure S7:** Cyclic voltammograms and UV-Vis spectra of a 1 mM solution of complex **2** in DMF in the presence of 60 mM of Acetic acid before and after 5-hour bulk electrolysis performed at  $-1.93$  V vs.  $Fc^{+/0}$



- **Overpotential determination**

Determine the standard potential of Acetic acid in DMF: based on the equation (1) [1]

$$E^\circ(\text{HA}/\text{A}^-; \text{H}_2) = E^\circ(\text{H}^+/\text{H}_2) - 2.303(\text{RT}/\text{F})\text{p}K_{\text{a}(\text{HA})} + \varepsilon_{\text{D}} - (\text{RT}/2\text{F})\ln(\text{C}_0/\text{C}^0_{\text{H}_2}) \quad (1)$$

$$E^\circ(\text{H}^+/\text{H}_2) = -0.662 \text{ V (vs Fc}^{+/0}) \quad [2]$$

pK<sub>a</sub> of Acetic acid in DMF: 13.5

$$\varepsilon_{\text{D}} = 0.04 \text{ V}$$

C<sub>0</sub>: concentration of acetic acid

C<sup>0</sup><sub>H<sub>2</sub></sub>: concentration of dissolved hydrogen at standard condition = 1.9 mM.

- Complex [Co<sup>II</sup><sub>2</sub>L<sub>2</sub>] (1) with 60 mM Acetic acid in DMF

$$E^\circ(\text{HA}/\text{A}^-; \text{H}_2) = E^T_{1/2} = (-0.662) - [(2.303 \times 8.314 \times 298)/96485] \times 13.5 + 0.04 - [(8.314 \times 298)/(2 \times 96485)] \ln(60/1.9) = -1.46 \text{ V (vs Fc}^{+/0})$$

$$\text{Overpotential} = E^T_{1/2} - E_{\text{cat}/2} = -1.46 - (-1.92) = 0.46 \text{ V (vs Fc}^{+/0})$$

- Complex [Co<sup>I</sup>Co<sup>III</sup>L<sub>2</sub>] (2) with 60 mM Acetic acid in DMF

$$E^\circ(\text{HA}/\text{A}^-; \text{H}_2) = E^T_{1/2} = -1.46 \text{ V (vs Fc}^{+/0})$$

$$\text{Overpotential} = E^T_{1/2} - E_{\text{cat}/2} = -1.46 - (-1.93) = 0.47 \text{ V (vs Fc}^{+/0})$$

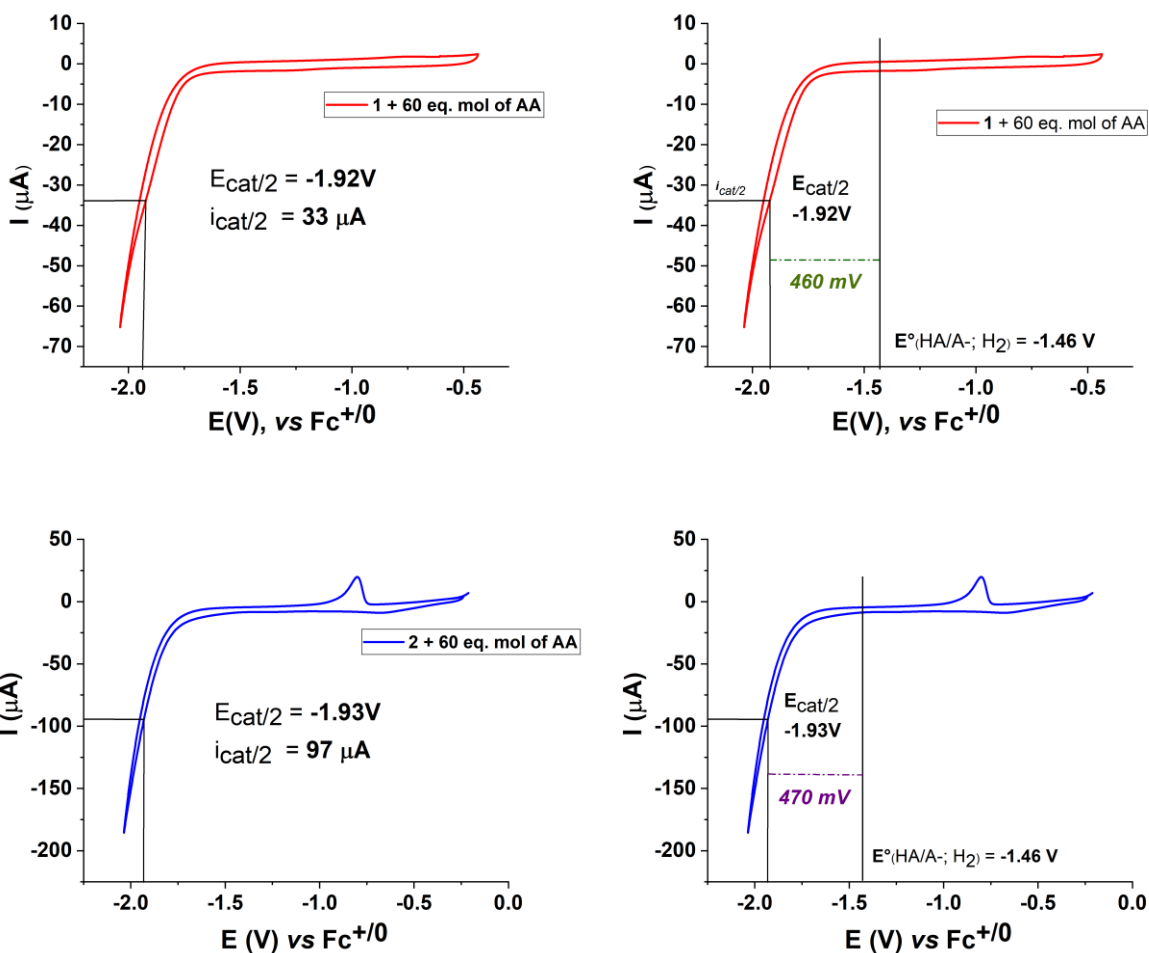

**Figure S8:** Determination of  $i_{cat/2}$ ;  $E_{cat/2}$  and overpotential of complexes **1** and **2**

- **Diffusion coefficient determination**

Using the the Randles-Sevcik equation<sup>[3]</sup>:

$$i_p = 0.4463 \times n^{3/2} \times F^{3/2} \times A \times [cat] \times (RT)^{-1/2} \times D^{1/2} \times \nu^{1/2}$$

Where  $i_p$  is the cathodic peak current (A),  $R = 8.314$  J/mol K,  $T = 299$ K,  $F = 96485$  C/mol,  $\nu$  is scan rate (V/s),  $A$  is the surface area of electrode ( $m^2$ ),  $n$  is the number of electrons transferred,  $[cat]$  is the concentration of catalyst (M) and  $D$  is the diffusion coefficient ( $m^2/s$ ). The plot of  $i_p$  versus the square root of scan rate is the linear regression equation and the diffusion coefficient can be extracted from the slope of such linear fitting. As a result, the values of  $D$  of complex **1** and **2** were  $7.48 \times 10^{-7} \text{ cm}^2/s$  and  $3.32 \times 10^{-6} \text{ cm}^2/s$ , respectively.

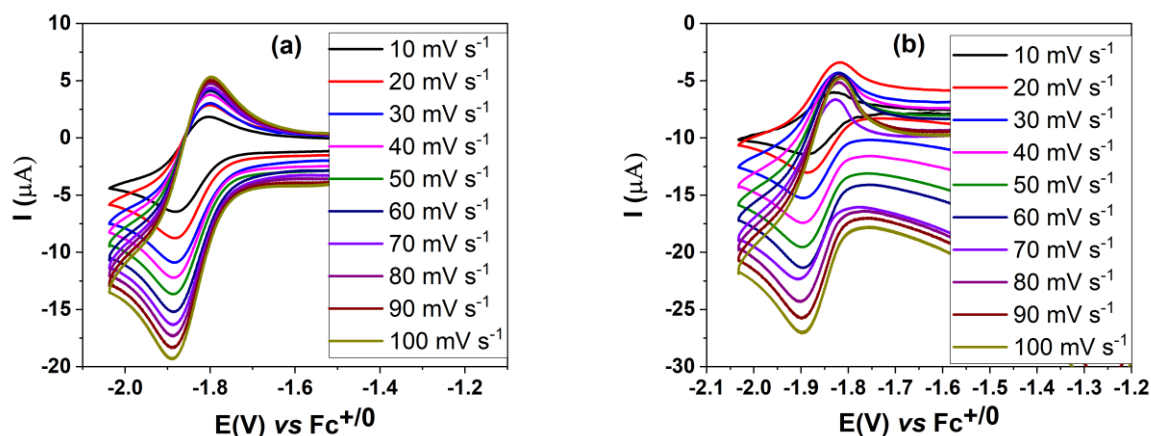

**Figure S9:** Cyclic voltammograms of complex **1** (a) and **2** (b) at various scan rates

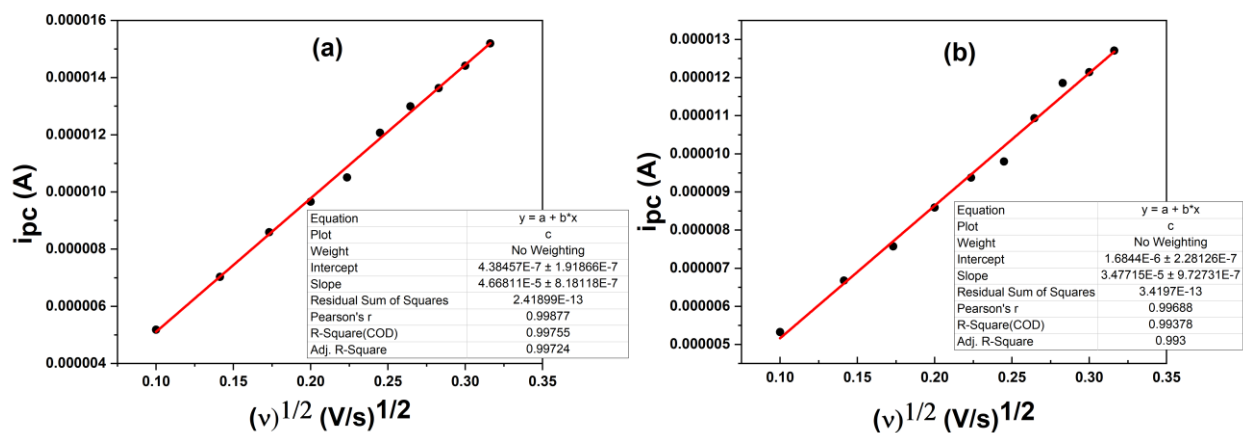

**Figure S10:** The plots of  $i_p$  versus the square root of scan rate of complex **1** (a) and **2** (b)

**Table S3:** The peak separation analysis of complex 1

| Scan rate (mV/s) | $\Delta E =  E_{pc} - E_{pa} $ (mV) | The number of e |
|------------------|-------------------------------------|-----------------|
| 10               | 77                                  | 1.3             |
| 20               | 81                                  | 1.4             |
| 30               | 84                                  | 1.4             |
| 40               | 86                                  | 1.5             |
| 50               | 89                                  | 1.5             |
| 60               | 87                                  | 1.5             |
| 70               | 89                                  | 1.5             |
| 80               | 91                                  | 1.5             |
| 90               | 92                                  | 1.6             |
| 100              | 93                                  | 1.6             |

**Table S4:** The peak separation analysis of complex 2

| Scan rate (mV/s) | $\Delta E =  E_{pc} - E_{pa} $ (mV) | The number of e |
|------------------|-------------------------------------|-----------------|
| 10               | 59                                  | 1.0             |
| 20               | 70                                  | 1.2             |
| 30               | 74                                  | 1.3             |
| 40               | 76                                  | 1.3             |
| 50               | 79                                  | 1.3             |
| 60               | 77                                  | 1.3             |
| 70               | 78                                  | 1.3             |
| 80               | 86                                  | 1.5             |
| 90               | 80                                  | 1.4             |
| 100              | 82                                  | 1.4             |

**Table S5:** The values of rate constants extracted from FOWA with various concentration of Acetic acid

| Catalyst    | Parameter             | [AA] mM   |           |           |            |            |
|-------------|-----------------------|-----------|-----------|-----------|------------|------------|
|             |                       | 39        | 69        | 109       | 159        | 219        |
| Complex (1) | slope <sub>FOWA</sub> | 2.36129   | 3.6845    | 5.62887   | 9.08636    | 10.65935   |
|             | k <sub>obs</sub>      | 0.53883   | 1.31192   | 3.06192   | 7.97869    | 10.98028   |
|             | k <sub>cat</sub>      | 13.81611  | 19.01341  | 28.09104  | 50.18046   | 50.13825   |
| Complex (2) | slope <sub>FOWA</sub> | 17.57088  | 22.10996  | 29.32824  | 45.11062   | 59.8623    |
|             | k <sub>obs</sub>      | 30.45376  | 48.22029  | 84.84493  | 200.72963  | 353.47661  |
|             | k <sub>cat</sub>      | 780.86555 | 698.84475 | 778.39383 | 1262.45047 | 1614.04844 |

**Table S6:** Comparison of two catalysts (1); (2) with other published dicobalt complexes

| Complexes                            | Solvent            | Proton Source                           | Overpotential mV (vs. Fc <sup>+0</sup> ) | Faradaic Efficiency | Ref  |
|--------------------------------------|--------------------|-----------------------------------------|------------------------------------------|---------------------|------|
| (1)                                  | DMF                | Acetic acid                             | 460                                      | 95%                 |      |
| (2)                                  | DMF                | Acetic Acid                             | 470                                      | 85%                 |      |
| Pyridazine dicobalt                  | DMF                | 2,6-dichloroanilinium tetrafluoroborate | n.i                                      | n.i                 | [4]  |
| Polypyridine-pyrazine dicobalt       | CH <sub>3</sub> CN | <i>p</i> -TsOH                          | n.i                                      | 40%                 | [5]  |
| Glyoxime-[BO <sub>4</sub> ] dicobalt | DMF                | Protonated DMF                          | 954                                      | 88%                 | [6]  |
| Tetrakis-Schiff Base Dicobalt        | CH <sub>3</sub> CN | Acetic acid                             | 310                                      | 72-94%              | [7]  |
| Polypyridine-pyrazole dicobalt       | CH <sub>3</sub> CN | TFA                                     | n.i                                      | 79%                 | [8]  |
| Bis(thiosemicarbazone) dicobalt      | DMF                | Et <sub>3</sub> NHBF <sub>4</sub>       | n.i                                      | 65%                 | [9]  |
| Polypyridine-Amido bridge dicobalt   | CH <sub>3</sub> CN | Acetic acid                             | n.i                                      | 94%                 | [10] |
| <i>n.i: no information</i>           |                    |                                         |                                          |                     |      |

## References

- [1] V. Fourmond, P.-A. Jacques, M. Fontecave, V. Artero, *Inorganic Chemistry* **2010**, *49*, 10338-10347.
- [2] M. L. Pegis, J. A. S. Roberts, D. J. Wasylenko, E. A. Mader, A. M. Appel, J. M. Mayer, *Inorganic Chemistry* **2015**, *54*, 11883-11888.
- [3] R. Jain, A. A. Mamun, R. M. Buchanan, P. M. Kozlowski, C. A. Grapperhaus, *Inorganic Chemistry* **2018**, *57*, 13486-13493.
- [4] N. K. Szymczak, L. A. Berben, J. C. Peters, *Chemical Communications* **2009**, 6729-6731.
- [5] C. Di Giovanni, C. Gimbert-Suriñach, M. Nippe, J. Benet-Buchholz, J. R. Long, X. Sala, A. Llobet, *Chemistry – A European Journal* **2016**, *22*, 361-369.
- [6] S. M. Laga, J. D. Blakemore, L. M. Henling, B. S. Brunshwig, H. B. Gray, *Inorganic Chemistry* **2014**, *53*, 12668-12670.
- [7] S. Kal, A. S. Filatov, P. H. Dinolfo, *Inorganic Chemistry* **2014**, *53*, 7137-7145.
- [8] S. Mandal, S. Shikano, Y. Yamada, Y.-M. Lee, W. Nam, A. Llobet, S. Fukuzumi, *Journal of the American Chemical Society* **2013**, *135*, 15294-15297.
- [9] T. Straistari, R. Hardré, J. Fize, S. Shova, M. Giorgi, M. Réglie, V. Artero, M. Orio, *Chemistry – A European Journal* **2018**, *24*, 8779-8786.
- [10] K. K. Kpogo, S. Mazumder, D. Wang, H. B. Schlegel, A. T. Fiedler, C. N. Verani, *Chemistry – A European Journal* **2017**, *23*, 9272-9279.
